# Supplementary material
Source: PubMed Central journal article supplement (PMC5576716)
Supplement: NIHMS550547-supplement-supplement_1.pdf [file NIHMS550547-supplement-supplement_1.pdf]

**The Proteolysis Adaptor NblA Binds to the N-terminus of  $\beta$ -phycoerythrin: Implications in the Mechanism of  
Phycobilisome Degradation**

Amelia Y. Nguyen<sup>1</sup>, William P. Bricker<sup>2</sup>, Hao Zhang<sup>3</sup>, Daniel A. Weisz<sup>3</sup>, Michael Gross<sup>3</sup>, Himadri B. Pakrasi<sup>1</sup>

<sup>1</sup>Department of Biology, Washington University, St. Louis, MO 63130, USA

<sup>2</sup>Laboratory for Computational Biology & Biophysics, Department of Biological Engineering, Massachusetts Institute of Technology, Cambridge, MA 02139, USA

<sup>3</sup>Department of Chemistry, Washington University, St. Louis, MO 63130, USA

Address correspondence to:

Himadri B. Pakrasi

Email: [pakrasi@wustl.edu](mailto:pakrasi@wustl.edu)

Mailing Address: Washington University in St. Louis, Campus Box 1095, One Brookings Drive, St. Louis, MO 63130-4899

Telephone: (314) 935-6853

Fax: (314) 935-8818

**Supplementary Data**

**(Supplementary Table S1 and Supplementary Figures S1-S3)**

**Table S1** Strains, plasmids, and oligonucleotides

| <b>Strains, plasmids, or oligonucleotides</b>     | <b>Description</b>                                                                              | <b>Source of reference</b> |
|---------------------------------------------------|-------------------------------------------------------------------------------------------------|----------------------------|
| <b>Strains</b>                                    |                                                                                                 |                            |
| <i>Synechococcus</i> 2973                         | Wild-type fast growing cyanobacterium                                                           | (Yu et al. 2015)           |
| <i>Synechococcus</i> 2973 $\Delta nblA$           | Fast growing cyanobacterium with <i>nblA</i> deleted                                            | (Yu et al. 2015)           |
| DH5 $\alpha$ MCR <i>E. coli</i>                   | Background strain                                                                               |                            |
| Transformed pET21a/<br>NblA <sub>2973</sub> _His7 | <i>E. coli</i> transformed with expression vector carrying<br><i>nblA</i> <sub>2973</sub> _His7 | This reference             |
| <b>Plasmids</b>                                   |                                                                                                 |                            |
| pET21a                                            | Expression vector containing multiple cloning sites                                             |                            |
| pET21a/ NblA <sub>2973</sub> _His7                | Vector for expression of <i>nblA</i> <sub>2973</sub> _His7                                      | This reference             |
| <b>Oligonucleotides<sup>a</sup></b>               |                                                                                                 |                            |
| # nbl1: NblA.TEV.His.F                            | AGATATACATatgctccccctctccccg                                                                    |                            |
| # nbl2: pET21a.R                                  | gggggagcatATGTATATCTCCTTCTTAAAGTTAAAC                                                           |                            |
| # nbl3: pET21a.F                                  | GAGAACCTGTACTTCCAGGGCAGTAGTCACCACCACCACCACCAC                                                   |                            |
| # nbl4: NblA.TEV.His.R                            | ACTACTGCCCTGGAAGTACAGGTTCTCacttccttggcgaatcatgC                                                 |                            |

<sup>a</sup>Oligonucleotides read in 5' to 3' direction.

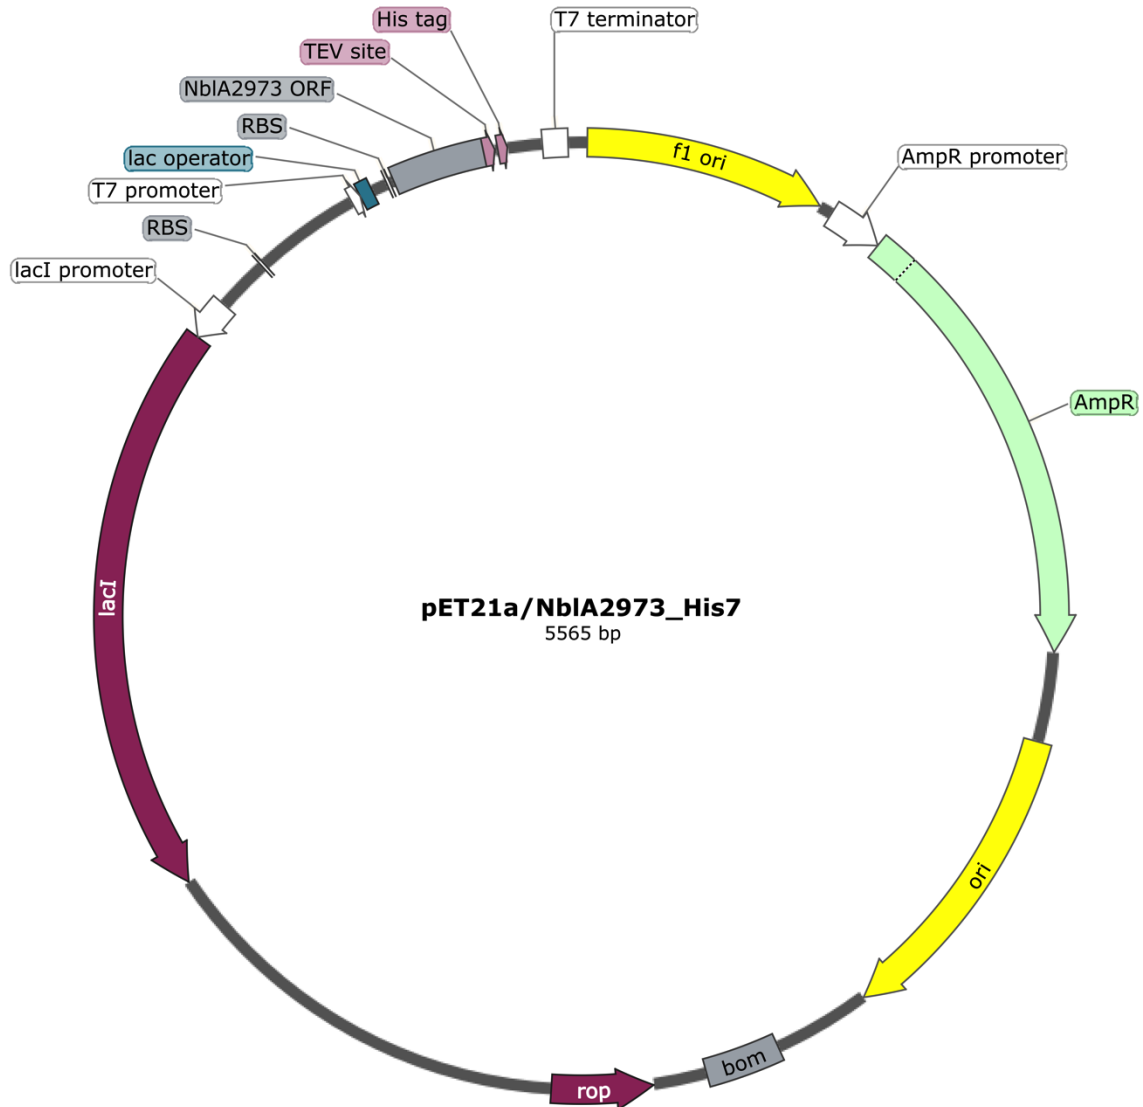

**Fig S1** Plasmid map of the overexpression of the NblA<sub>2973</sub>\_His<sub>7</sub> strain

ORF of *nblA* was appended with a C-terminal TEV and His tag in the pET21a expression vector. The T7 promoter was used to overexpress *nblA*.

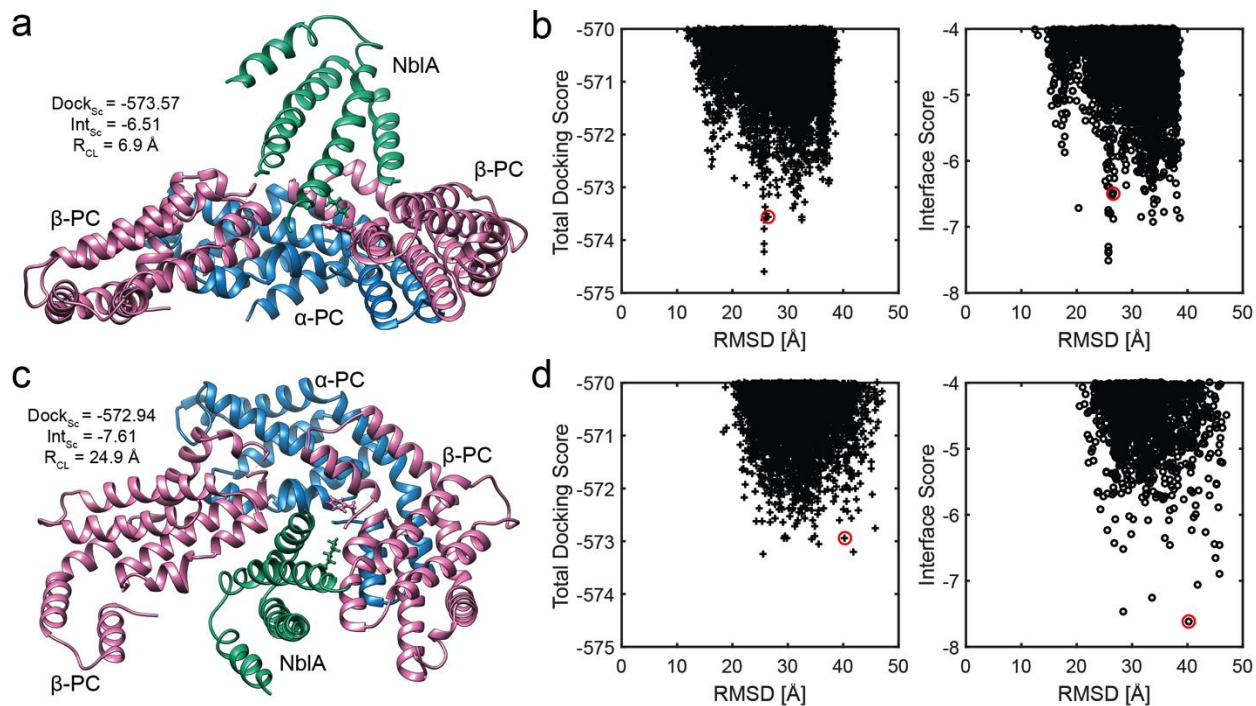

**Fig S2** Docking results of an NblA dimer globally docked to  $\alpha$ -PC/ $\beta$ -PC monomer from initial orientation I

**a** Best globally docked pose sorted by lowest cross-linking distance [ $R_{CL}$ ] between residue  $K^{52}$  of NblA (green) and residue  $T^2$  of  $\beta$ -PC (pink) after extracting the top ten scoring structures from 100,000 docked poses from initial orientation I. Total docking score [ $\text{Dock}_{sc}$ ] and interface score [ $\text{Int}_{sc}$ ] are also reported for the pose in addition to cross-linking distance [ $R_{CL}$ ]. **b** Total docking score for the 100,000 globally docked poses vs. RMSD [ $\text{\AA}$ ] from initial orientation I, and Interface score for the 100,000 globally docked poses vs. RMSD [ $\text{\AA}$ ] from initial orientation I. The location of the best globally docked pose from orientation I is circled in red on both plots. **c** Best globally docked pose sorted by lowest cross-linking distance [ $R_{CL}$ ] between residue  $K^{52}$  of NblA (green) and residue  $T^2$  of  $\beta$ -PC (pink) after extracting the top ten scoring structures from 100,000 docked poses from initial orientation II. Total docking score [ $\text{Dock}_{sc}$ ] and interface score [ $\text{Int}_{sc}$ ] are also reported for the pose in addition to cross-linking distance [ $R_{CL}$ ]. **d** Total

docking score for the 100,000 globally docked poses vs. RMSD [ $\text{\AA}$ ] from initial orientation II, and Interface score for the 100,000 globally docked poses vs. RMSD [ $\text{\AA}$ ] from initial orientation II. The location of the best globally docked pose from orientation II is circled in red on both plots.

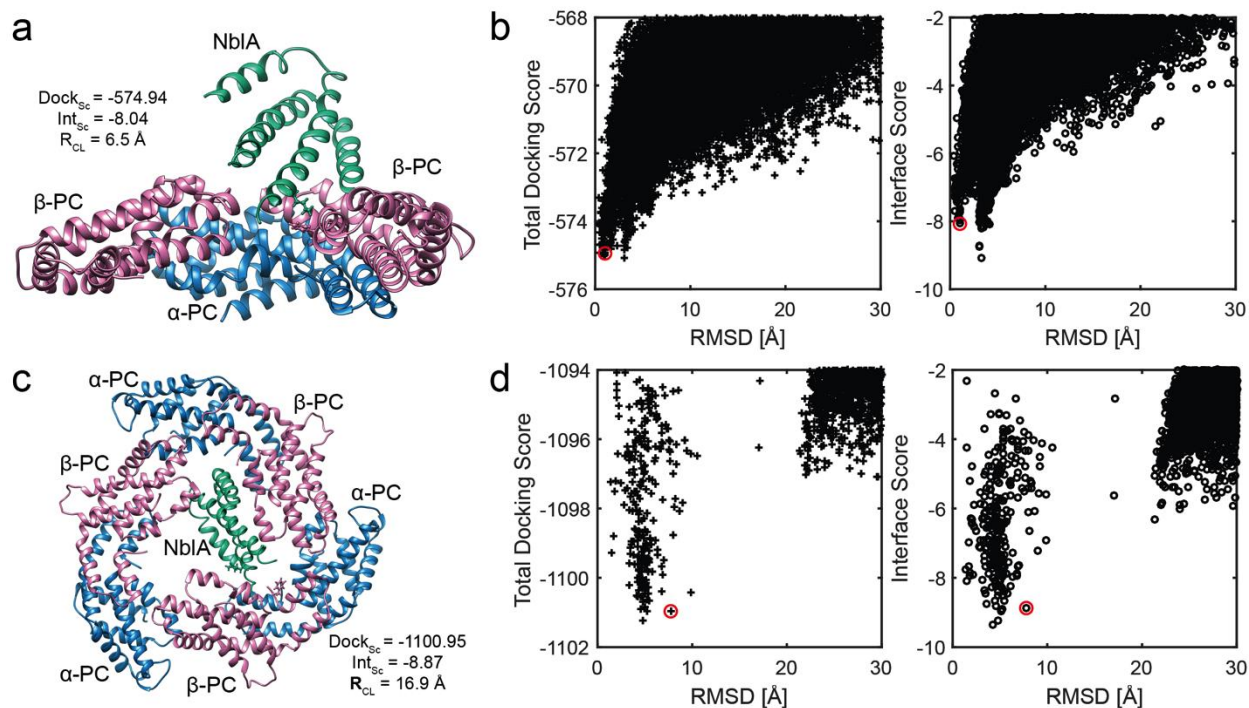

**Fig S3** Docking results of an NblA dimer globally docked to  $\alpha$ -PC/ $\beta$ -PC monomer from initial orientation II

**a** Best locally docked pose sorted by lowest cross-linking distance [ $R_{CL}$ ] between residue  $K^{52}$  of NblA (green) and residue  $T^2$  of  $\beta$ -PC (pink) after extracting the top ten scoring structures from 25,000 docked poses from initial orientation I. Total docking score [ $Dock_{sc}$ ] and interface score [ $Int_{sc}$ ] are also reported for the pose in addition to cross-linking distance [ $R_{CL}$ ]. **b** Total docking score for the 25,000 locally docked poses vs. RMSD [ $\text{\AA}$ ] from initial orientation I, and Interface score for the 25,000 locally docked poses vs. RMSD [ $\text{\AA}$ ] from initial orientation I. The location of the best locally docked pose from orientation I is circled in red on both plots. **c** Best locally docked pose sorted by lowest cross-linking distance [ $R_{CL}$ ] between residue  $K^{52}$  of NblA (green) and residue  $T^2$  of  $\beta$ -PC (pink) after extracting the top ten scoring structures from 25,000 docked poses from initial orientation II. Total docking score [ $Dock_{sc}$ ] and interface score [ $Int_{sc}$ ] are also reported for the pose in addition to cross-linking distance [ $R_{CL}$ ]. **d** Total docking score for the 25,000 locally docked poses vs. RMSD [ $\text{\AA}$ ] from initial orientation II, and Interface score for the 25,000 locally docked poses vs. RMSD [ $\text{\AA}$ ] from initial orientation II. The location of the best locally docked pose from orientation II is circled in red on both plots.
